# Supplementary material for: Detecting and phasing minor single-nucleotide variants from long-read sequencing data
Source: PubMed Central journal article supplement (PMC8144375; doi:10.1038/s41467-021-23289-4), 2021-05-24
Supplement: 41467_2021_23289_MOESM3_ESM.pdf [file 41467_2021_23289_MOESM3_ESM.pdf]

## Description of Additional Supplementary Files

File Name: Supplementary Data file 1.

Description: SRA IDs of the PacBio Bordetella and E. coli data.

File Name: Supplementary Data file 2.

Description: SRA IDs of the ONT K. pneumoniae data.

File Name: Supplementary Data file 3.

Description: SRA IDs of the metagenomic data.

File Name: Supplementary Data file 4.

Description: SRA IDs of the data used to train the context effect model.

File Name: Supplementary Data file 5.

Description: The R2 of cross validation using different parameters to train the context effect model.
